# Supplementary material for: Simultaneous isolation of hormone receptor–positive breast cancer organoids and fibroblasts reveals stroma-mediated resistance mechanisms
Source: PubMed Central journal article supplement (PMC10415704; doi:10.1016/j.jbc.2023.105021), 2023-07-07
Supplement: mmc5.pdf [file mmc5.pdf]

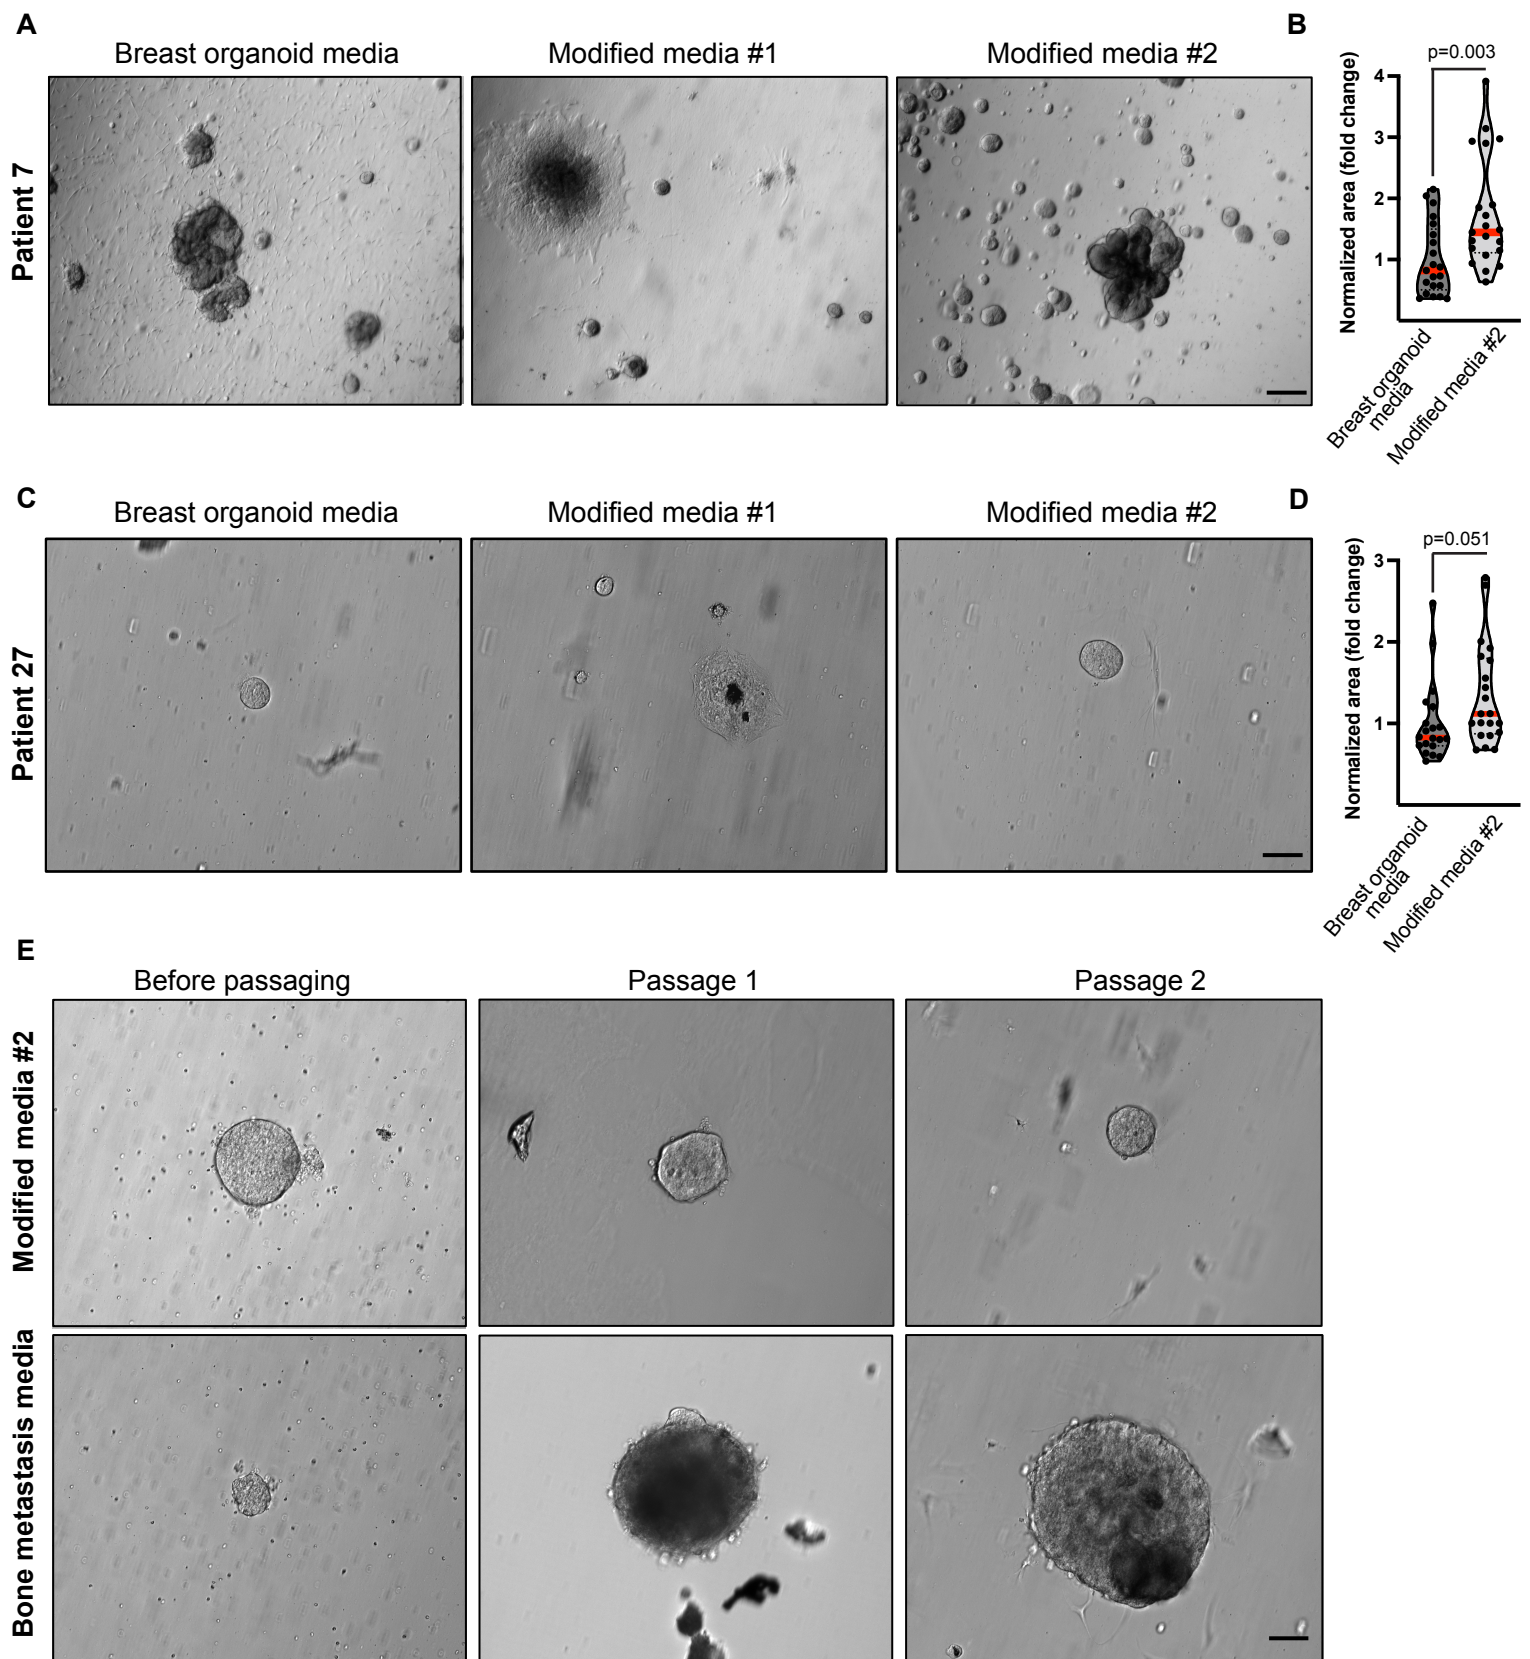

**Figure S1. Optimized media supports growth of HR+ patient-derived organoid cultures.** A) Brightfield images of Patient #7 PDOs (papillary carcinoma in situ) grown in published breast organoid media, modified media #1 and modified #2. B) Quantification of diameter in PDOs grown in organoid media and modified media #2 at passage 2. C) Brightfield images of Patient #27 PDOs (invasive ductal carcinoma) grown in published breast organoid media, modified media #1 and modified #2. D) Quantification of diameter in PDOs grown in published breast organoid media and modified media #2 at passage 2. Red line indicates the mean diameter of each treatment group E) Brightfield images of Patient #8 PDOs (bone metastasis) before passaging, at passage 1 and passage 2 in modified #2 or bone metastasis media. Student's T-test was used to assess significance. Scalebars: 500  $\mu$ m (A), 200  $\mu$ m (C, E)
