# Supplementary material for: Simultaneous isolation of hormone receptor–positive breast cancer organoids and fibroblasts reveals stroma-mediated resistance mechanisms
Source: PubMed Central journal article supplement (PMC10415704; doi:10.1016/j.jbc.2023.105021), 2023-07-07
Supplement: mmc7.pdf [file mmc7.pdf]

Figure S3.

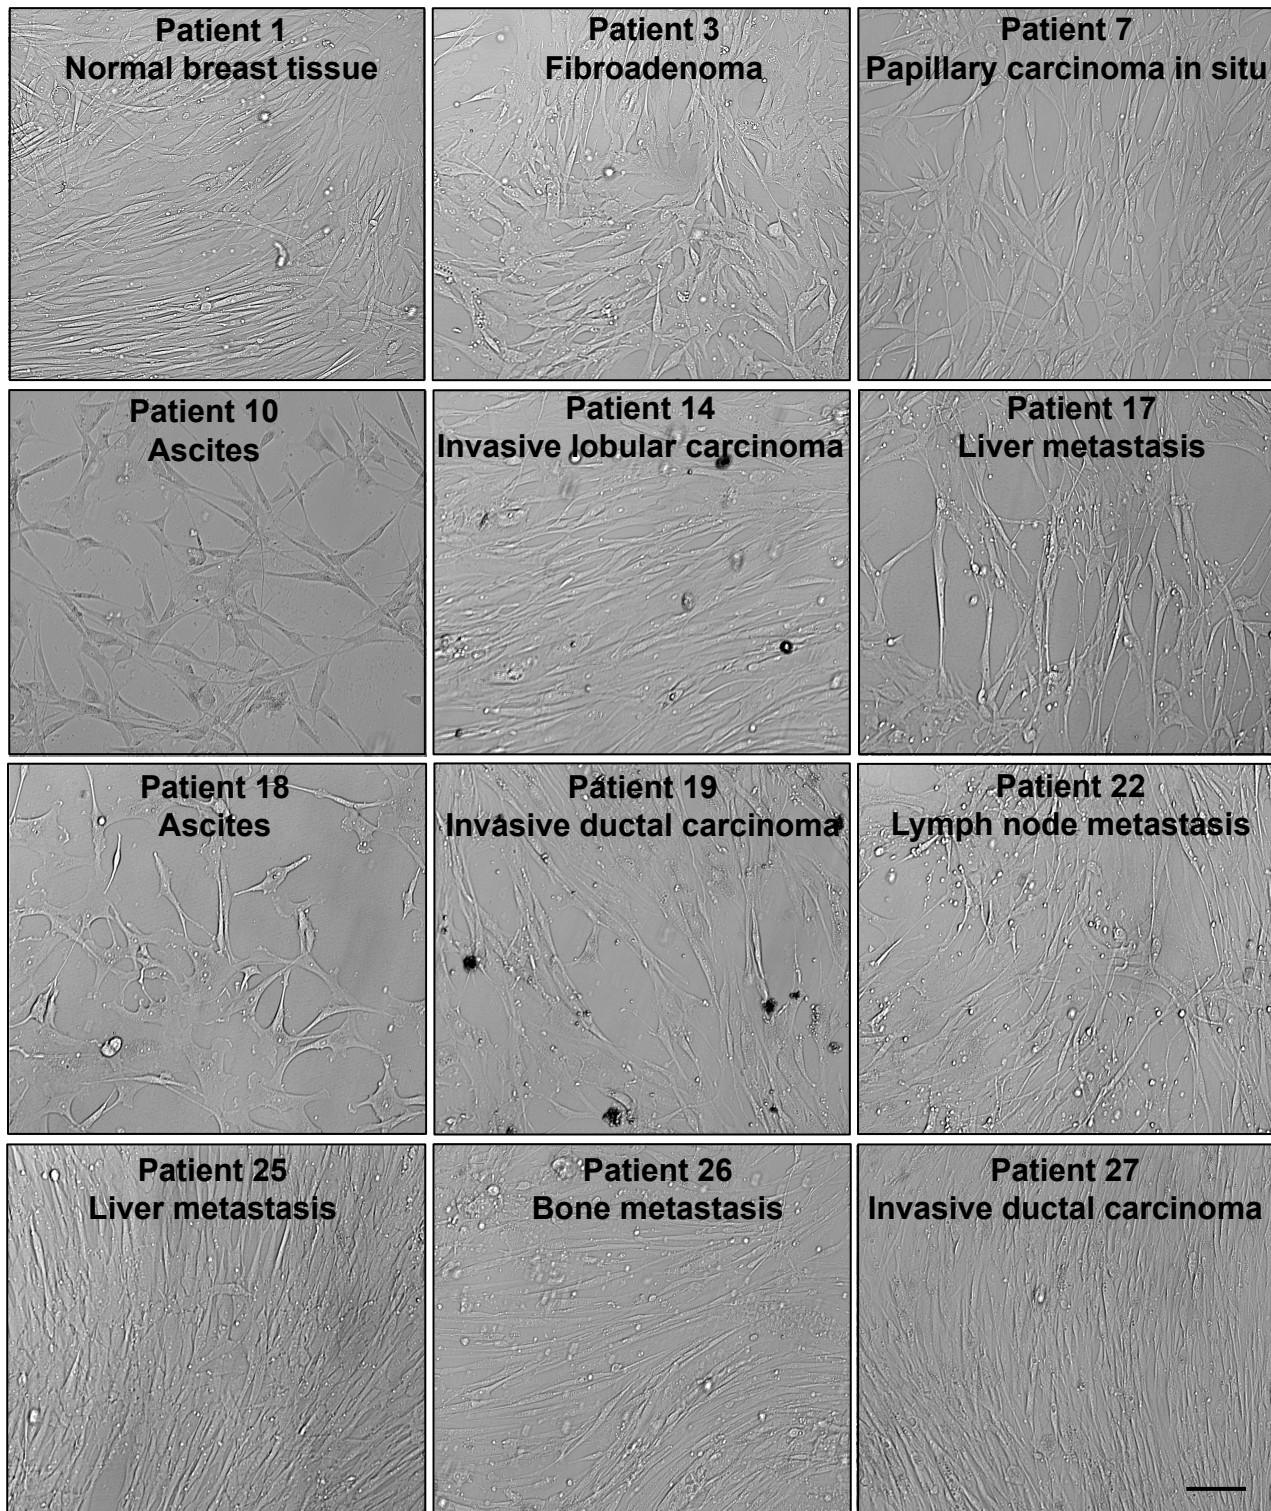

**Figure S3. Propagation of patient-derived cancer-associated fibroblasts from primary and metastatic ER+ breast cancer.** Brightfield microscopy images of the CAF lines isolated from different patient biopsies. Scale bars: 200  $\mu$ m
